# Supplementary material for: Mental Health in Schoolchildren in Joint Physical Custody: A Longitudinal Study
Source: MDPI journal article supplement (doi:10.3390/children8060473), 2021-06-04
Supplement: s1 [file s1]

Supplemental material.

**Table S1.** Characteristics of the children living in a nuclear family at the six months' interview according to participation in the 11-year follow-up/inclusion in this study.

|                                      |                                                | <b>Participant<br/>11-year</b> | <b>Non-participant</b> |
|--------------------------------------|------------------------------------------------|--------------------------------|------------------------|
|                                      |                                                | N=31,519                       | N=36,749               |
|                                      |                                                | %                              | %                      |
| <i>Child gender</i>                  | Boy                                            | 47.4                           | 52.6                   |
|                                      | Girl                                           | 52.8                           | 48.4                   |
| <i>Parental mental health</i>        |                                                |                                |                        |
|                                      | Psychiatric care: mother before birth of child | 4.9                            | 7.4                    |
|                                      | Psychiatric care: father before birth of child | 4.7                            | 6.1                    |
| <i>Maternal burden at 6 months</i>   |                                                |                                |                        |
|                                      | Mother burdened by relation to father          |                                |                        |
|                                      | yes                                            | 12.5                           | 12.7                   |
|                                      | Mother burdened by economy                     |                                |                        |
|                                      | yes                                            | 18.3                           | 19.7                   |
| <i>Socio-demographic</i>             |                                                |                                |                        |
| Maternal age                         | 16-22                                          | 1.9                            | 3.5                    |
|                                      | 23-28                                          | 33.6                           | 36.0                   |
|                                      | 29-34                                          | 48.5                           | 46.0                   |
|                                      | 35+                                            | 15.9                           | 14.5                   |
| Maternal education at birth of child |                                                |                                |                        |
|                                      | Primary only                                   | 4.9                            | 9.1                    |
|                                      | Secondary                                      | 36.6                           | 44.1                   |
|                                      | 1-3 post-secondary                             | 43.0                           | 35.6                   |
|                                      | 4 + post-secondary                             | 15.5                           | 11.2                   |
| Paternal education at birth of child |                                                |                                |                        |
|                                      | Primary only                                   | 10.3                           | 13.9                   |
|                                      | Secondary                                      | 45.6                           | 49.2                   |
|                                      | 1-3 post-secondary                             | 27.3                           | 23.8                   |
|                                      | 4 + post-secondary                             | 16.8                           | 13.0                   |

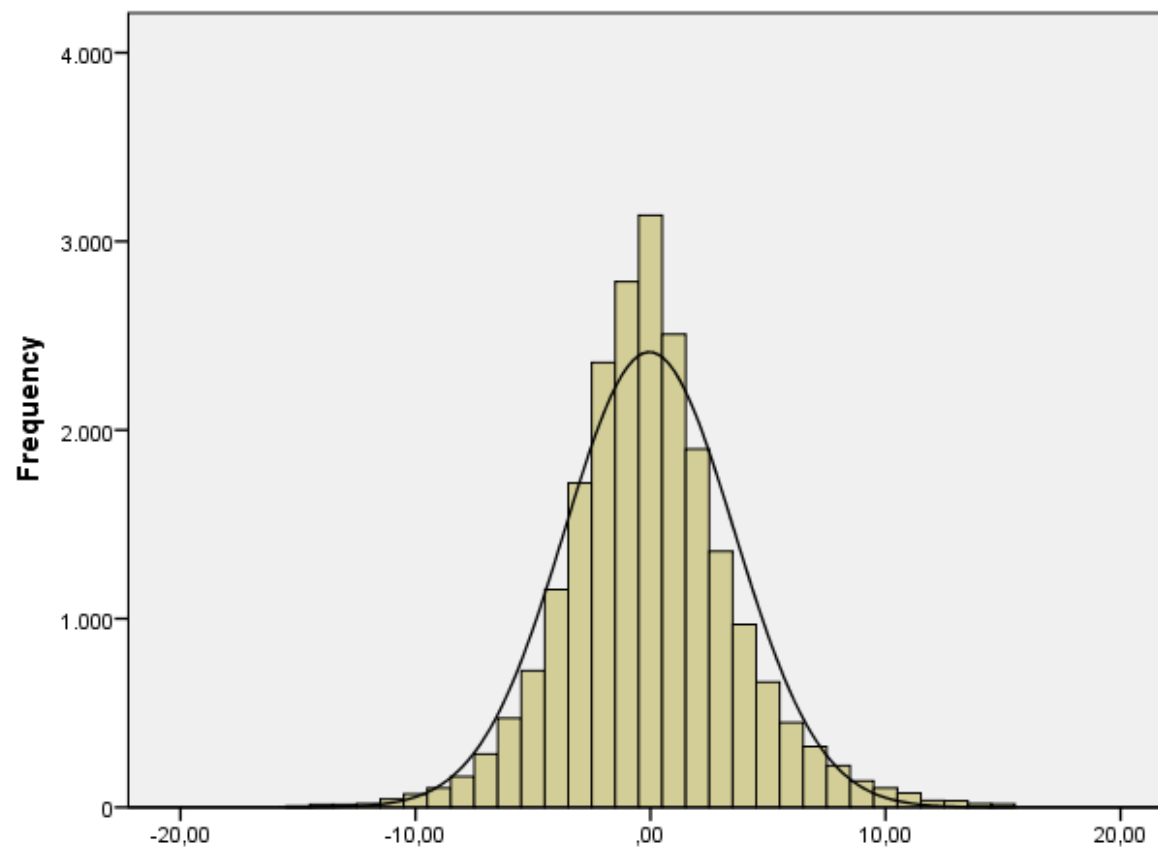

**Figure S1.** Histogram of distribution of change in total SDQ scores in maternal report from age 7 years to 11 years (N=24,479).
